# Supplementary material for: A Comparison of the Antioxidant Potential and Metabolite Analysis of Marine Fungi Associated with the Red Algae Pterocladiella capillacea from Northern Taiwan
Source: MDPI journal article supplement (doi:10.3390/antiox13030336), 2024-03-11
Supplement: s1 [file s1]

# Supplementary file

| Compounds                                                                 | m/z       | Retention Time (min) | Drift Time (ms) | Chromatographic Peak Width (min) | Max Fold Change | Maximum Abundance | Formula       |
|---------------------------------------------------------------------------|-----------|----------------------|-----------------|----------------------------------|-----------------|-------------------|---------------|
| Niazicin A                                                                | 771.24    | 9.396                | 5.524           | 2.71665                          | 2223.1664       | 155202.77         | C34H46N2O14S2 |
| Chembl4211493                                                             | 601.29    | 21.31                | 5.0998725       | 0.4372667                        | 2124.0947       | 97804.718         | C33H40N6O3S   |
| Sucrose octaacetate                                                       | 701.19    | 25.75                | 4.9298768       | 1.0998667                        | 3.9352786       | 109316.67         | C28H38O19     |
| Hemorphin-4                                                               | 583.28    | 22.492033            | 4.9298768       | 0.5101167                        | 921.92343       | 62948.708         | C29H35N5O7    |
| Phenyl-agarose                                                            | 724.26    | 25.755217            | 5.2698683       | 1.0998667                        | 5.4197024       | 16089.592         | C30H42O19     |
| (3b,20R,22R)-3,20,27-Trihydroxy-1-oxowitha-5,24-dienolide 3-glucoside     | 635.33    | 12.804933            | 4.6748831       | 0.77195                          | 150.80576       | 12936.765         | C34H50O11     |
| Digitoxigenin bisdigitoxide                                               | 657.36    | 14.2031              | 4.8448789       | 0.54655                          | 29.948839       | 12787.919         | C35H54O10     |
| LysoPS (16:0/0:0)                                                         | 498.28269 | 42.26705             | 3.9949001       | 2.09045                          | 52.387435       | 11497.575         | C22H44NO9P    |
| Sinalbine                                                                 | 735.20646 | 6.4607167            | 5.0998725       | 2.5709                           | 130.44119       | 20336.591         | C30H42N2O15S2 |
| Olodaterol                                                                | 387.19282 | 29.098083            | 2.1249469       | 0.6626333                        | 6.3739395       | 14503.532         | C21H26N2O5    |
| Motolimod                                                                 | 481.26204 | 12.331283            | 2.2949426       | 0.4372333                        | 14.972486       | 6348.0114         | C28H34N4O2    |
| Docosanamide                                                              | 340.35655 | 45.785283            | 2.719932        | 3.081                            | 10.509547       | 5797.607          | C22H45NO      |
| N-Nitrosofenfluramine                                                     | 261.12365 | 11.7415              | 1.9549511       | 1.2456333                        | 9.2114813       | 28770.256         | C12H15F3N2O   |
| Peonidin acetyl 3,5-diglucoside                                           | 685.21675 | 25.755217            | 4.759881        | 0.8448333                        | 3.7295936       | 8467.5307         | C30H35O17+    |
| Ophiopogonin C'                                                           | 745.41909 | 14.96825             | 6.2898428       | 0.4440333                        | 27.962322       | 5341.087          | C39H62O12     |
| Aminopentol                                                               | 406.35308 | 22.783517            | 3.1449214       | 0.9176833                        | 7.3517769       | 17448.697         | C22H47NO5     |
| Ribociclib                                                                | 452.29107 | 20.146483            | 3.0599235       | 0.4372667                        | 1336.7866       | 4802.418          | C23H30N8O     |
| Suvorexant                                                                | 451.16402 | 33.9713              | 2.8899278       | 1.0270167                        | 19.589935       | 4624.7511         | C23H23ClN6O2  |
| Janthitrem G                                                              | 630.37881 | 44.138867            | 5.6098598       | 1.027                            | 11.102486       | 11179.177         | C39H51NO6     |
| Labadoside                                                                | 755.25328 | 9.7603667            | 5.2698683       | 0.7355                           | 119.09643       | 4414.334          | C38H42O16     |
| 1-Sinapoyl-2,2'-diferuloylgentiobiose                                     | 918.30207 | 9.43245              | 7.5648109       | 1.79215                          | 2092.6033       | 3672.4643         | C43H48O21     |
| Digitoxigenin 3-[glucosyl-(1->6)-glucosyl-(1->4)-2,6-dideoxyribohexoside] | 851.39793 | 29.571733            | 7.6498088       | 0.9541333                        | 9.1262573       | 11713.118         | C41H64O17     |
| Boviquinone 4                                                             | 413.26408 | 33.534067            | 3.0599235       | 0.8812833                        | 59.063042       | 3387.6572         | C26H36O4      |

**Table S1.** LC-MS analysis and major compounds present in the fungal extracts.

**Figure S1.** Chemical structures of the abundant compounds identified in fungal extracts: Figure S1 is an extended version of Table 3, it shows the specific functional group information about the metabolites, complementing the overall idea conveyed by Table 3. The functional group information of specific metabolites can be easily identified from the figures provided.

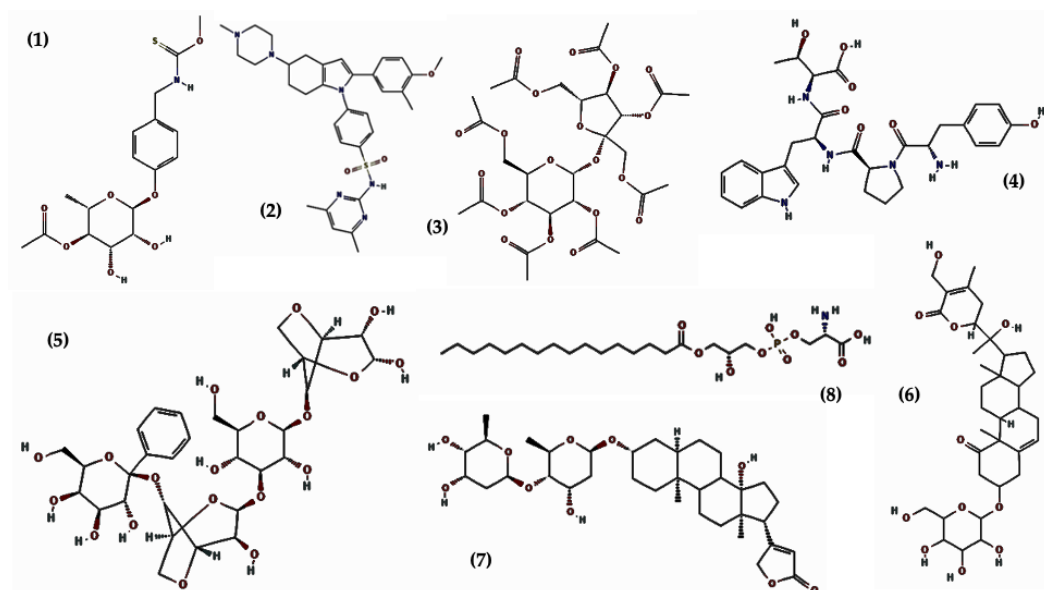

**Figure S1.** Chemical structures of the abundant compounds identified in fungal extracts: (1) niacinin A, (2) Chembl4211493, (3) sucrose octaacetate, (4) hemorphin-4, (5) phenyl-agarose, (6) (3b,20R,22R)-3,20,27-trihydroxy-1-oxowitha-5,24-dienolide 3-glucoside, (7) digitoxigenin bisdigitoxide, (8) lysoPS (16:0/0:0).

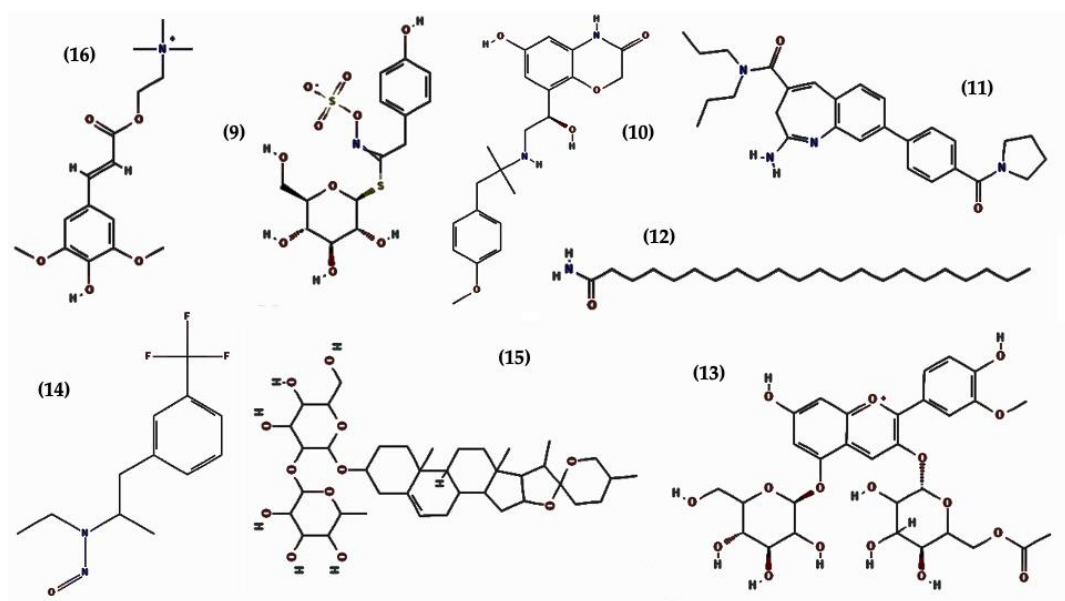

(9) and (16) sinalbine, (10) olodaterol, (11) motolimod, (12) docosanamide, (13) peonidin acetyl 3,5-diglucoside, (14) N-nitrosofenfluramine, (15) ophiopogonin C',

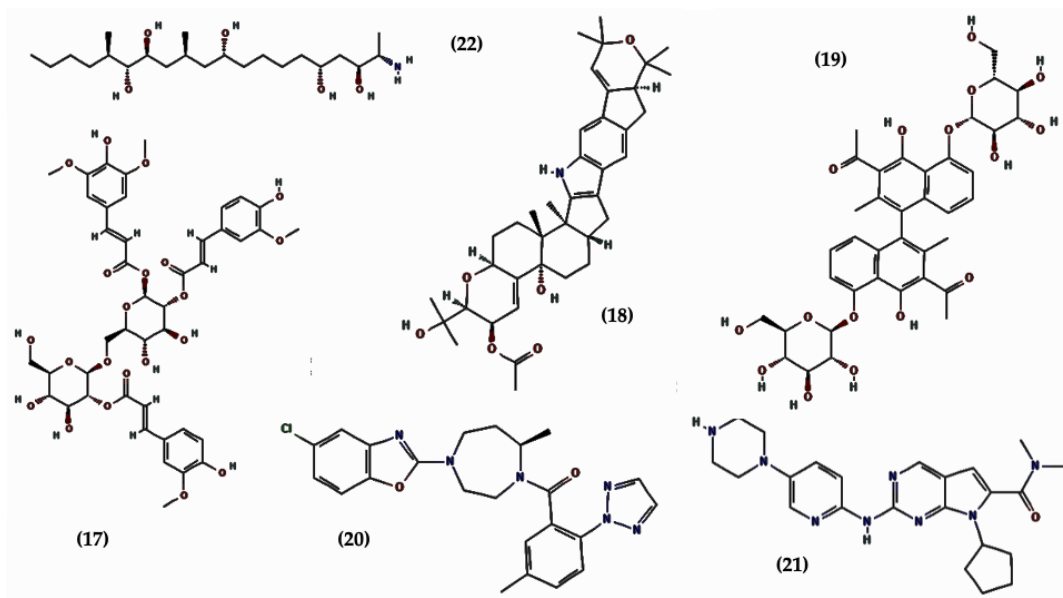

(17) 1-sinapoyl-2,2'-diferuloylgentiobiose, (18) janthitrem G, (19) labadoside, (20) su-vorexant, (21) ribociclib, and (22) aminopentol.
